# Supplementary material
Source: PubMed Central journal article supplement (PMC4505231)
Supplement: AAC.00366-15_zac008154209so1.pdf [file AAC.00366-15_zac008154209so1.pdf]

**Table S1** *Plasmodium* genus-specific (GenB) and species-specific *P. falciparum* (PfA) and *P. vivax* (PvA) primer and probe DNA sequences used for TaqMan™ real-time PCR detection of *Plasmodium* 18s ribosomal RNA gene.

| <b>Primer/Probe Name</b> | <b>Sequence</b>                             |
|--------------------------|---------------------------------------------|
| GenB-Forward             | 5'-TTGAACGAGGAATGCCTAGTAAGC-3'              |
| GenB-Reverse             | 5'-GACGGGCGGTGTGTACAAAG-3'                  |
| GenB Probe               | 5'-6FAM-AGATTGTGCTGACTACGTC-TMGBNFQ-3'      |
| PfA-Forward              | 5'-GCGGCGAGTACACTATATTCTTATTTG-3'           |
| PfA-Reverse              | 5'-AAGCTTTTCAATCAAGCAAGTACATTC-3'           |
| PfA Probe                | 5'-6FAM-AATATCCTTTTCCCTGTTCTACTA-TMGBNFQ-3' |
| PvA-Forward              | 5'-CGTATCGACTTTGTGCGCATT-3'                 |
| PvA-Reverse              | 5'-TTCCAAGCCGAAGCAAAGAA-3'                  |
| PvA Probe                | 5'-6FAM-TGCTATTATGTGTTCTTTTAA-TMGBNFQ-3'    |

**Table S2** *Ex vivo* drug susceptibility of *P. falciparum* isolates collected during 2008-2013 in western, northern, and southern Cambodia.

| Region | Drugs | 2008 |                           | 2009 |                             | 2010 |                             | 2011 |                             | 2012 |                             | 2013 |                             |
|--------|-------|------|---------------------------|------|-----------------------------|------|-----------------------------|------|-----------------------------|------|-----------------------------|------|-----------------------------|
|        |       | N    | GM(range)IC <sub>50</sub> | N    | GM (range) IC <sub>50</sub> |
| West   | DHA   | 56   | 6.6 (0.1-23.5)            | 79   | 8.5 (0.1-30.2)              | 26   | 9.6 (1.2-20.7)              | 43   | 5.3 (1.8-25.5)              |      |                             |      |                             |
|        | AS    | 55   | 4.9 (0.1-17.3)            | 77   | 5.4 (0.3-20.6)              | 29   | 7.0 (1.2-18.6)              | 44   | 4.4 (1.4-13.2)              |      |                             |      |                             |
|        | MQ    | 56   | 33.6 (0.7-197.8)          | 77   | 48.6 (0.7-322.1)            | 29   | 55.4 (3.8-199.5)            | 44   | 53.3 (6.4-205.2)            |      |                             |      |                             |
|        | PPQ   |      |                           |      |                             | 11   | 17.3 (4.0-59.7)             | 39   | 17.9 (4.1-45.8)             |      |                             |      |                             |
|        | QN    | 56   | 111.4 (1.8-536.8)         | 78   | 129.6 (2.1-417.5)           | 29   | 170.5 (38.7-420)            | 44   | 123.4 (15.6-336.6)          |      |                             |      |                             |
|        | CQ    | 55   | 153.9 (4.2-762.2)         | 75   | 168.6 (4.0-710.7)           | 29   | 234.7 (78.3-503.8)          | 44   | 169.8 (21.5-504.1)          |      |                             |      |                             |
|        | LUM   | 56   | 6.6 (0.7-39.1)            | 77   | 6.4 (0.1-68.6)              | 18   | 7.3 (1.8-39.8)              |      |                             |      |                             |      |                             |
| North  | DHA   |      |                           | 127  | 8.1 (0.8-25.4)              | 44   | 6.4 (1.5-28.3)              | 40   | 4.5 (0.9-19.5)              | 8    | 9.8 (4.9-24.5)              | 89   | 6.0 (1.6-29.0)              |
|        | AS    |      |                           | 136  | 5.3 (0.6-20.6)              | 48   | 4.7 (0.9-19.5)              | 38   | 4.3 (0.8-14.7)              | 8    | 7.3 (3.8-14.4)              | 86   | 4.6 (1.1-22.4)              |
|        | MQ    |      |                           | 134  | 62.3 (6.2-205.5)            | 46   | 67.1 (15.0-245.5)           | 29   | 51.4 (3.4-178.1)            | 7    | 50.8 (8.6-179.0)            | 78   | 26.0 (0.4-216.8)            |
|        | PPQ   |      |                           |      |                             | 13   | 12.8 (1.2-47.3)             | 32   | 16.9 (8.4-40.3)             | 7    | 26.9 (18.3-45.8)            | 81   | 29.6 (4.4-150.1)            |
|        | QN    |      |                           | 135  | 149.7 (32.2-513.6)          | 47   | 155.1 (40.8-420.7)          | 33   | 115.2 (16.9-488.1)          | 7    | 146.8 (60.5-595.4)          | 85   | 91.9 (9.7-553.0)            |
|        | CQ    |      |                           | 135  | 139.4 (19.1-786)            | 47   | 153.5 (52.9-591.6)          | 33   | 161.8 (28.2-509.2)          | 7    | 118.2 (26.9-400.8)          | 84   | 112.0 (4.0-666.6)           |
|        | LUM   |      |                           | 135  | 7.6 (1.0-35.7)              | 34   | 8.9 (1.3-22.5)              |      |                             |      |                             |      |                             |
|        | ATQ   |      |                           |      |                             |      |                             |      |                             |      |                             | 73   | 6.4 (0.8-31.1)              |
| South  | DHA   |      |                           |      |                             |      |                             | 72   | 5.3 (1.1-23.4)              | 11   | 4.4 (0.7-12.5)              |      |                             |
|        | AS    |      |                           |      |                             |      |                             | 73   | 4.3 (1.0-13.8)              | 11   | 3.1 (0.4-9.3)               |      |                             |
|        | MQ    |      |                           |      |                             |      |                             | 65   | 76.6 (5.1-257.2)            | 9    | 71.2 (23.1-205.3)           |      |                             |
|        | PPQ   |      |                           |      |                             |      |                             | 71   | 15.3 (4.6-65.8)             | 10   | 14.3 (6.2-28.1)             |      |                             |
|        | QN    |      |                           |      |                             |      |                             | 68   | 141.4 (36.9-517.9)          | 9    | 158.7 (68.7-241.3)          |      |                             |
|        | CQ    |      |                           |      |                             |      |                             | 72   | 146.9 (15.2-556.2)          | 11   | 95.3 (35.5-298.3)           |      |                             |

Geometric mean IC<sub>50</sub>s with range and number of samples (N) are indicated.
